# Supplementary material
Source: PubMed Central journal article supplement (PMC5742041)
Supplement: NIHMS920829-supplement-Supplemental_Table_I.pdf [file NIHMS920829-supplement-Supplemental_Table_I.pdf]

## SUPPLEMENTAL MATERIAL

**Table I.** Characteristics of ischemic stroke cases by quintiles of urinary total arsenic ( $n=671$ )\*

|                               | Total cases         | Quintiles of urinary total arsenic( $\mu\text{g/g creatinine}$ ) <sup>†</sup> |                     |                     |                     |                     | <i>P</i> -value <sup>‡</sup> |
|-------------------------------|---------------------|-------------------------------------------------------------------------------|---------------------|---------------------|---------------------|---------------------|------------------------------|
|                               |                     | <4.07                                                                         | 4.07-6.09           | 6.10-9.39           | 9.40-19.30          | $\geq 19.31$        |                              |
| <i>n</i>                      | 671                 | 135                                                                           | 134                 | 134                 | 134                 | 134                 | --                           |
| Age(year)                     | 70.1 $\pm$ 8.6      | 68.0 $\pm$ 9.2                                                                | 70.4 $\pm$ 8.4      | 69.5 $\pm$ 8.5      | 71.5 $\pm$ 8.2      | 71.3 $\pm$ 8.3      | <0.01                        |
| Female (%)                    | 48.4                | 47.4                                                                          | 47.8                | 44.8                | 57.5                | 44.8                | 0.21                         |
| Black (%)                     | 41.6                | 40.0                                                                          | 44.0                | 41.0                | 47.8                | 35.1                | 0.29                         |
| Smoke (%)                     |                     |                                                                               |                     |                     |                     |                     |                              |
| Never                         | 42.5                | 37.0                                                                          | 42.5                | 42.5                | 50.8                | 39.6                | 0.07                         |
| Past                          | 41.0                | 37.8                                                                          | 41.0                | 41.0                | 38.8                | 46.3                |                              |
| Current                       | 16.5                | 25.2                                                                          | 16.4                | 16.4                | 10.5                | 14.2                |                              |
| Region (%)                    |                     |                                                                               |                     |                     |                     |                     |                              |
| Non-Stroke Belt               | 44.3                | 41.5                                                                          | 36.6                | 41.0                | 48.5                | 53.7                | 0.17                         |
| Stroke Belt                   | 33.8                | 43.0                                                                          | 37.3                | 35.8                | 29.9                | 23.1                |                              |
| Stroke Buckle                 | 21.9                | 15.6                                                                          | 26.1                | 23.1                | 21.6                | 23.1                |                              |
| Alcohol (%)                   |                     |                                                                               |                     |                     |                     |                     |                              |
| Never                         | 32.2                | 37.0                                                                          | 39.6                | 35.8                | 30.6                | 17.9                | <0.01                        |
| Past                          | 21.3                | 29.9                                                                          | 20.2                | 16.4                | 23.9                | 17.2                |                              |
| Current                       | 46.5                | 34.1                                                                          | 40.3                | 47.8                | 45.5                | 64.9                |                              |
| Education (%)                 |                     |                                                                               |                     |                     |                     |                     |                              |
| <High school                  | 15.4                | 20.7                                                                          | 17.9                | 13.4                | 19.4                | 5.2                 | <0.01                        |
| High school graduate          | 29.7                | 34.8                                                                          | 32.1                | 26.9                | 25.4                | 29.1                |                              |
| Some college                  | 25.9                | 24.4                                                                          | 29.9                | 26.1                | 31.3                | 17.9                |                              |
| $\geq$ College graduate       | 29.1                | 20.0                                                                          | 20.2                | 33.6                | 23.9                | 47.8                |                              |
| PA (%)                        |                     |                                                                               |                     |                     |                     |                     |                              |
| None                          | 34.0                | 30.3                                                                          | 30.5                | 38.2                | 38.6                | 32.6                | 0.70                         |
| 1~3/week                      | 34.7                | 37.1                                                                          | 40.6                | 33.6                | 31.1                | 36.4                |                              |
| $\geq 4$ /week                | 30.2                | 32.6                                                                          | 28.9                | 28.2                | 30.3                | 31.1                |                              |
| BMI (%)                       |                     |                                                                               |                     |                     |                     |                     |                              |
| <25.0 kg/m <sup>2</sup>       | 26.2                | 21.5                                                                          | 29.9                | 25.4                | 28.4                | 26.1                | 0.25                         |
| 25~29.9 kg/m <sup>2</sup>     | 39.6                | 36.3                                                                          | 34.3                | 45.5                | 35.8                | 46.3                |                              |
| $\geq 30.0$ kg/m <sup>2</sup> | 34.1                | 42.2                                                                          | 35.8                | 29.1                | 35.8                | 27.6                |                              |
| SBP, mmHg                     | 132.9 $\pm$ 17.5    | 132.3 $\pm$ 18.0                                                              | 133.2 $\pm$ 15.7    | 133.0 $\pm$ 20.1    | 135.1 $\pm$ 16.2    | 130.9 $\pm$ 17.3    | 0.40                         |
| DBP, mmHg                     | 77.4 $\pm$ 9.9      | 77.3 $\pm$ 9.6                                                                | 77.6 $\pm$ 9.6      | 77.2 $\pm$ 11.2     | 79.2 $\pm$ 9.5      | 75.5 $\pm$ 9.3      | 0.045                        |
| TC, mg/dL                     | 191.4 $\pm$ 41.8    | 192.2 $\pm$ 42.3                                                              | 191.0 $\pm$ 44.4    | 191.7 $\pm$ 40.2    | 198.3 $\pm$ 42.6    | 184.0 $\pm$ 38.8    | 0.11                         |
| LDL-C, mg/dL                  | 113.1 $\pm$ 34.5    | 115.6 $\pm$ 36.2                                                              | 112.6 $\pm$ 31.9    | 108.6 $\pm$ 31.1    | 120.0 $\pm$ 37.5    | 108.5 $\pm$ 34.6    | 0.04                         |
| Glucose, mg/dL                | 107.8 $\pm$ 39.7    | 113.5 $\pm$ 40.0                                                              | 112.3 $\pm$ 46.3    | 104.6 $\pm$ 46.2    | 101.7 $\pm$ 26.5    | 107.0 $\pm$ 35.3    | 0.08                         |
| Hypertension (%)              | 73.5                | 72.6                                                                          | 77.6                | 74.6                | 75.4                | 67.2                | 0.37                         |
| MI (%)                        | 21.2                | 20.0                                                                          | 22.4                | 20.9                | 17.2                | 25.4                | 0.57                         |
| Type 2 diabetes (%)           | 27.3                | 30.4                                                                          | 28.4                | 26.1                | 27.6                | 23.9                | 0.81                         |
| Albuminuria (%)               | 25.5                | 21.5                                                                          | 30.6                | 23.1                | 25.4                | 26.9                | 0.48                         |
| Urine cadmium (ng/g)          | 0.52<br>(0.30-0.90) | 0.63<br>(0.36-0.98)                                                           | 0.51<br>(0.24-0.88) | 0.52<br>(0.28-0.98) | 0.47<br>(0.30-0.81) | 0.52<br>(0.30-0.87) | 0.13                         |

|                         |                     |                     |                     |                     |                     |                     |       |
|-------------------------|---------------------|---------------------|---------------------|---------------------|---------------------|---------------------|-------|
| Serum mercury<br>(ng/g) | 0.27<br>(0.14-0.47) | 0.20<br>(0.11-0.31) | 0.21<br>(0.12-0.39) | 0.25<br>(0.14-0.45) | 0.31<br>(0.18-0.55) | 0.42<br>(0.26-0.66) | <0.01 |
|-------------------------|---------------------|---------------------|---------------------|---------------------|---------------------|---------------------|-------|

BMI=body mass index; DBP = diastolic blood pressure; LDL-C = low-density lipoprotein-cholesterol; MI= Myocardial infarction; PA=physical activity; SBP = systolic blood pressure; TC = total cholesterol.

\* Data are means  $\pm$  standard deviations, medians (inter-quartile ranges), or proportions.

† Quintiles of urinary total arsenic were calculated based on the random sub-cohort.

‡ *P* values are for any difference across subgroups by using analysis of variance, Kruskal-Wallis test, or chi-squared test as appropriate.
